# Supplementary material for: A multi-centre, tolerability study of a cannabidiol-enriched Cannabis Herbal Extract for chronic headaches in adolescents: The CAN-CHA protocol
Source: PubMed Central journal article supplement (PMC11414974; doi:10.1371/journal.pone.0290185), 2024-09-20
Supplement: pone.0290185.s001.pdf [file pone.0290185.s001.pdf]

## Spirit Checklist

| Reporting Item                                          |                     | Page and Line Number                                                                                                                                                                                                                                                                     | Reason if not applicable                                               |
|---------------------------------------------------------|---------------------|------------------------------------------------------------------------------------------------------------------------------------------------------------------------------------------------------------------------------------------------------------------------------------------|------------------------------------------------------------------------|
| <b>Administrative information</b>                       |                     |                                                                                                                                                                                                                                                                                          |                                                                        |
| Title                                                   | <a href="#">#1</a>  | Descriptive title identifying the study design, population, interventions, and, if applicable, trial acronym                                                                                                                                                                             | Page 1, Line number 1-2                                                |
| Trial registration                                      | <a href="#">#2a</a> | Trial identifier and registry name. If not yet registered, name of intended registry                                                                                                                                                                                                     | Page 17, Line number 20                                                |
| Trial registration: data set                            | <a href="#">#2b</a> | All items from the World Health Organization Trial Registration Data Set                                                                                                                                                                                                                 | n/a<br>We have registered trial with clinicaltrial.gov only            |
| Protocol version                                        | <a href="#">#3</a>  | Date and version identifier                                                                                                                                                                                                                                                              | Page 17, Line number 22                                                |
| Funding                                                 | <a href="#">#4</a>  | Sources and types of financial, material, and other support                                                                                                                                                                                                                              | Page 2, Line 25-26                                                     |
| Roles and responsibilities: contributorship             | <a href="#">#5a</a> | Names, affiliations, and roles of protocol contributors                                                                                                                                                                                                                                  | Page 1-2, Line 4-38, 1-11                                              |
| Roles and responsibilities: sponsor contact information | <a href="#">#5b</a> | Name and contact information for the trial sponsor                                                                                                                                                                                                                                       | Page 5, line 40                                                        |
| Roles and responsibilities: sponsor and funder          | <a href="#">#5c</a> | Role of study sponsor and funders, if any, in study design; collection, management, analysis, and interpretation of data; writing of the report; and the decision to submit the report for publication, including whether they will have ultimate authority over any of these activities | n/a<br>Sponsor and funder doesn't have any of these roles in our trial |

|                                                           |                     |                                                                                                                                                                                                                                                                  |                                     |                                  |
|-----------------------------------------------------------|---------------------|------------------------------------------------------------------------------------------------------------------------------------------------------------------------------------------------------------------------------------------------------------------|-------------------------------------|----------------------------------|
| Roles and responsibilities: committees                    | <a href="#">#5d</a> | Composition, roles, and responsibilities of the coordinating centre, steering committee, endpoint adjudication committee, data management team, and other individuals or groups overseeing the trial, if applicable (see Item 21a for data monitoring committee) | Supplementary page1 Line 1-28       |                                  |
| <b>Introduction</b>                                       |                     |                                                                                                                                                                                                                                                                  | Page 5-6                            |                                  |
| Background and rationale                                  | <a href="#">#6a</a> | Description of research question and justification for undertaking the trial, including summary of relevant studies (published and unpublished) examining benefits and harms for each intervention                                                               | Page 5, Line 1-39, Page 2, Line 1-4 |                                  |
| Background and rationale: choice of comparators           | <a href="#">#6b</a> | Explanation for choice of comparators                                                                                                                                                                                                                            | n/a                                 | we are not having any comparator |
| Objectives                                                | <a href="#">#7</a>  | Specific objectives or hypotheses                                                                                                                                                                                                                                | Page 6, line 6-21                   |                                  |
| Trial design                                              | <a href="#">#8</a>  | Description of trial design including type of trial (eg, parallel group, crossover, factorial, single group), allocation ratio, and framework (eg, superiority, equivalence, non-inferiority, exploratory)                                                       | Page 8, Line 8-25                   |                                  |
| <b>Methods: Participants, interventions, and outcomes</b> |                     |                                                                                                                                                                                                                                                                  |                                     |                                  |
| Study setting                                             | <a href="#">#9</a>  | Description of study settings (eg, community clinic, academic hospital) and list of countries where data will be collected. Reference to where                                                                                                                   | Page: 16, Line 9-10                 |                                  |

|                                 |                      |                                                                                                                                                                                                                                                           |                            |                                                           |
|---------------------------------|----------------------|-----------------------------------------------------------------------------------------------------------------------------------------------------------------------------------------------------------------------------------------------------------|----------------------------|-----------------------------------------------------------|
|                                 |                      | list of study sites can be obtained                                                                                                                                                                                                                       |                            |                                                           |
| Eligibility criteria            | <a href="#">#10</a>  | Inclusion and exclusion criteria for participants. If applicable, eligibility criteria for study centres and individuals who will perform the interventions (eg, surgeons, psychotherapists)                                                              | Page 6, 7 Line 22-39, 1,19 |                                                           |
| Interventions: description      | <a href="#">#11a</a> | Interventions for each group with sufficient detail to allow replication, including how and when they will be administered                                                                                                                                | Page 7, 8 Line 29-40, 1-8  |                                                           |
| Interventions: modifications    | <a href="#">#11b</a> | Criteria for discontinuing or modifying allocated interventions for a given trial participant (eg, drug dose change in response to harms, participant request, or improving / worsening disease)                                                          | Page 10, Line 16-36        |                                                           |
| Interventions: adherence        | <a href="#">#11c</a> | Strategies to improve adherence to intervention protocols, and any procedures for monitoring adherence (eg, drug tablet return; laboratory tests)                                                                                                         | Page 14, Line 13-41        |                                                           |
| Interventions: concomitant care | <a href="#">#11d</a> | Relevant concomitant care and interventions that are permitted or prohibited during the trial                                                                                                                                                             | n/a                        | We are not restricting concomitant care and interventions |
| Outcomes                        | <a href="#">#12</a>  | Primary, secondary, and other outcomes, including the specific measurement variable (eg, systolic blood pressure), analysis metric (eg, change from baseline, final value, time to event), method of aggregation (eg, median, proportion), and time point | Page 11, Line 1-37         |                                                           |

|                                                                     |                      |                                                                                                                                                                                                                                                                                                                                                          |                    |                                     |
|---------------------------------------------------------------------|----------------------|----------------------------------------------------------------------------------------------------------------------------------------------------------------------------------------------------------------------------------------------------------------------------------------------------------------------------------------------------------|--------------------|-------------------------------------|
|                                                                     |                      | for each outcome.<br>Explanation of the clinical relevance of chosen efficacy and harm outcomes is strongly recommended                                                                                                                                                                                                                                  |                    |                                     |
| Participant timeline                                                | <a href="#">#13</a>  | Time schedule of enrolment, interventions (including any run-ins and washouts), assessments, and visits for participants. A schematic diagram is highly recommended (see Figure)                                                                                                                                                                         | Table 1, Page 19   |                                     |
| Sample size                                                         | <a href="#">#14</a>  | Estimated number of participants needed to achieve study objectives and how it was determined, including clinical and statistical assumptions supporting any sample size calculations                                                                                                                                                                    | Page 16, Line 4-10 |                                     |
| Recruitment                                                         | <a href="#">#15</a>  | Strategies for achieving adequate participant enrolment to reach target sample size                                                                                                                                                                                                                                                                      | Page 8, Line 14-22 |                                     |
| <b>Methods: Assignment of interventions (for controlled trials)</b> |                      |                                                                                                                                                                                                                                                                                                                                                          |                    |                                     |
| Allocation: sequence generation                                     | <a href="#">#16a</a> | Method of generating the allocation sequence (eg, computer-generated random numbers), and list of any factors for stratification. To reduce predictability of a random sequence, details of any planned restriction (eg, blocking) should be provided in a separate document that is unavailable to those who enrol participants or assign interventions | n/a                | Its an open label, single arm study |

|                                                           |                      |                                                                                                                                                                                                                                                                                                                                                                                                              |                     |                                     |
|-----------------------------------------------------------|----------------------|--------------------------------------------------------------------------------------------------------------------------------------------------------------------------------------------------------------------------------------------------------------------------------------------------------------------------------------------------------------------------------------------------------------|---------------------|-------------------------------------|
| Allocation concealment mechanism                          | <a href="#">#16b</a> | Mechanism of implementing the allocation sequence (eg, central telephone; sequentially numbered, opaque, sealed envelopes), describing any steps to conceal the sequence until interventions are assigned                                                                                                                                                                                                    | n/a                 | Its an open label, single arm study |
| Allocation: implementation                                | <a href="#">#16c</a> | Who will generate the allocation sequence, who will enrol participants, and who will assign participants to interventions                                                                                                                                                                                                                                                                                    | n/a                 | Its an open label, single arm study |
| Blinding (masking)                                        | <a href="#">#17a</a> | Who will be blinded after assignment to interventions (eg, trial participants, care providers, outcome assessors, data analysts), and how                                                                                                                                                                                                                                                                    | n/a                 | Its an open label, single arm study |
| Blinding (masking): emergency unblinding                  | <a href="#">#17b</a> | If blinded, circumstances under which unblinding is permissible, and procedure for revealing a participant's allocated intervention during the trial                                                                                                                                                                                                                                                         | n/a                 | Its an open label, single arm study |
| <b>Methods: Data collection, management, and analysis</b> |                      |                                                                                                                                                                                                                                                                                                                                                                                                              |                     |                                     |
| Data collection plan                                      | <a href="#">#18a</a> | Plans for assessment and collection of outcome, baseline, and other trial data, including any related processes to promote data quality (eg, duplicate measurements, training of assessors) and a description of study instruments (eg, questionnaires, laboratory tests) along with their reliability and validity, if known. Reference to where data collection forms can be found, if not in the protocol | Page 16, Line 12-27 |                                     |

|                                                  |                      |                                                                                                                                                                                                                                                                   |                               |                                 |
|--------------------------------------------------|----------------------|-------------------------------------------------------------------------------------------------------------------------------------------------------------------------------------------------------------------------------------------------------------------|-------------------------------|---------------------------------|
| Data collection plan: retention                  | <a href="#">#18b</a> | Plans to promote participant retention and complete follow-up, including list of any outcome data to be collected for participants who discontinue or deviate from intervention protocols                                                                         | Page 16, Line 12-27           |                                 |
| Data management                                  | <a href="#">#19</a>  | Plans for data entry, coding, security, and storage, including any related processes to promote data quality (eg, double data entry; range checks for data values). Reference to where details of data management procedures can be found, if not in the protocol | Page 16, Line 12-27           |                                 |
| Statistics: outcomes                             | <a href="#">#20a</a> | Statistical methods for analysing primary and secondary outcomes. Reference to where other details of the statistical analysis plan can be found, if not in the protocol                                                                                          | Page 16, Line 29-41           |                                 |
| Statistics: additional analyses                  | <a href="#">#20b</a> | Methods for any additional analyses (eg, subgroup and adjusted analyses)                                                                                                                                                                                          | Page 16, Line 29-41           |                                 |
| Statistics: analysis population and missing data | <a href="#">#20c</a> | Definition of analysis population relating to protocol non-adherence (eg, as randomised analysis), and any statistical methods to handle missing data (eg, multiple imputation)                                                                                   | n/a                           | It is not relevant to our study |
| <b>Methods: Monitoring</b>                       |                      |                                                                                                                                                                                                                                                                   |                               |                                 |
| Data monitoring: formal committee                | <a href="#">#21a</a> | Composition of data monitoring committee (DMC); summary of its role and reporting structure; statement of whether it is independent from the                                                                                                                      | Supplementary page1 Line 1-28 |                                 |

|                                   |                      |                                                                                                                                                                                                                                    |                               |               |
|-----------------------------------|----------------------|------------------------------------------------------------------------------------------------------------------------------------------------------------------------------------------------------------------------------------|-------------------------------|---------------|
|                                   |                      | sponsor and competing interests; and reference to where further details about its charter can be found, if not in the protocol. Alternatively, an explanation of why a DMC is not needed                                           |                               |               |
| Data monitoring: interim analysis | <a href="#">#21b</a> | Description of any interim analyses and stopping guidelines, including who will have access to these interim results and make the final decision to terminate the trial                                                            | Supplementary page1 Line 1-28 |               |
| Harms                             | <a href="#">#22</a>  | Plans for collecting, assessing, reporting, and managing solicited and spontaneously reported adverse events and other unintended effects of trial interventions or trial conduct                                                  | Supplementary page1 Line 1-28 |               |
| Auditing                          | <a href="#">#23</a>  | Frequency and procedures for auditing trial conduct, if any, and whether the process will be independent from investigators and the sponsor                                                                                        | Supplementary page1 Line 1-28 |               |
| <b>Ethics and dissemination</b>   |                      |                                                                                                                                                                                                                                    |                               |               |
| Research ethics approval          | <a href="#">#24</a>  | Plans for seeking research ethics committee / institutional review board (REC / IRB) approval                                                                                                                                      | Page 17 Line 26-30            |               |
| Protocol amendments               | <a href="#">#25</a>  | Plans for communicating important protocol modifications (eg, changes to eligibility criteria, outcomes, analyses) to relevant parties (eg, investigators, REC / IRBs, trial participants, trial registries, journals, regulators) | n/a                           | No amendments |

|                                      |                      |                                                                                                                                                                                                                               |                           |                                |
|--------------------------------------|----------------------|-------------------------------------------------------------------------------------------------------------------------------------------------------------------------------------------------------------------------------|---------------------------|--------------------------------|
| Consent or assent                    | <a href="#">#26a</a> | Who will obtain informed consent or assent from potential trial participants or authorised surrogates, and how (see Item 32)                                                                                                  | Page 8, Line 28-31        |                                |
| Consent or assent: ancillary studies | <a href="#">#26b</a> | Additional consent provisions for collection and use of participant data and biological specimens in ancillary studies, if applicable                                                                                         | Page 15, Line 35-38       |                                |
| Confidentiality                      | <a href="#">#27</a>  | How personal information about potential and enrolled participants will be collected, shared, and maintained in order to protect confidentiality before, during, and after the trial                                          | Page 14, Line 23-27       |                                |
| Declaration of interests             | <a href="#">#28</a>  | Financial and other competing interests for principal investigators for the overall trial and each study site                                                                                                                 | Page 2-3 Line 30-35, 1,29 |                                |
| Data access                          | <a href="#">#29</a>  | Statement of who will have access to the final trial dataset, and disclosure of contractual agreements that limit such access for investigators                                                                               | Page 17 Line 32-34        |                                |
| Ancillary and post trial care        | <a href="#">#30</a>  | Provisions, if any, for ancillary and post-trial care, and for compensation to those who suffer harm from trial participation                                                                                                 | Page 8, Line 23-24        |                                |
| Dissemination policy: trial results  | <a href="#">#31a</a> | Plans for investigators and sponsor to communicate trial results to participants, healthcare professionals, the public, and other relevant groups (eg, via publication, reporting in results databases, or other data sharing | n/a                       | No restrictions on publication |



|                                             |                      |                                                                                                                                                                                                |                     |                                           |
|---------------------------------------------|----------------------|------------------------------------------------------------------------------------------------------------------------------------------------------------------------------------------------|---------------------|-------------------------------------------|
|                                             |                      | arrangements), including any publication restrictions                                                                                                                                          |                     |                                           |
| Dissemination policy: authorship            | <a href="#">#31b</a> | Authorship eligibility guidelines and any intended use of professional writers                                                                                                                 | n/a                 | We are not utilizing professional writers |
| Dissemination policy: reproducible research | <a href="#">#31c</a> | Plans, if any, for granting public access to the full protocol, participant-level dataset, and statistical code                                                                                | n/a                 | Available on request                      |
| <b>Appendices</b>                           |                      |                                                                                                                                                                                                |                     |                                           |
| Informed consent materials                  | <a href="#">#32</a>  | Model consent form and other related documentation given to participants and authorised surrogates                                                                                             | Appendix 2          |                                           |
| Biological specimens                        | <a href="#">#33</a>  | Plans for collection, laboratory evaluation, and storage of biological specimens for genetic or molecular analysis in the current trial and for future use in ancillary studies, if applicable | Page 13, Line 21-31 |                                           |

It is strongly recommended that this checklist be read in conjunction with the SPIRIT 2013 Explanation & Elaboration for important clarification on the items. Amendments to the protocol should be tracked and dated. The SPIRIT checklist is copyrighted by the SPIRIT Group under the Creative Commons [“Attribution-NonCommercial-NoDerivs 3.0 Unported”](#) license. This checklist can be completed online using <https://www.goodreports.org/>, a tool made by the EQUATOR Network in collaboration with Penelope.ai
